## RESEARCH ARTICLE

# AMPK signaling mediates synphilin-1-induced hyperphagia and obesity in *Drosophila*

Jingnan Liu<sup>1,\*</sup>, Xiaobo Wang<sup>2</sup>, Rui Ma<sup>1</sup>, Tianxia Li<sup>1</sup>, Gongbo Guo<sup>2</sup>, Bo Ning<sup>2</sup>, Timothy H. Moran<sup>2</sup> and Wanli W. Smith<sup>2,‡</sup>

## ABSTRACT

Expression of synphilin-1 in neurons induces hyperphagia and obesity in a *Drosophila* model. However, the molecular pathways underlying synphilin-1-linked obesity remain unclear. Here, *Drosophila* models and genetic tools were used to study the synphilin-1-linked pathways in energy balance by combining molecular biology and pharmacological approaches. We found that expression of human synphilin-1 in flies increased AMP-activated kinase (AMPK) phosphorylation at Thr172 compared with that in non-transgenic flies. Knockdown of AMPK reduced AMPK phosphorylation and food intake in non-transgenic flies, and further suppressed synphilin-1-induced AMPK phosphorylation, hyperphagia, fat storage and body weight gain in transgenic flies. Expression of constitutively activated AMPK significantly increased food intake and body weight gain in non-transgenic flies, but it did not alter food intake in the synphilin-1 transgenic flies. In contrast, expression of dominant-negative AMPK reduced food intake in both non-transgenic and synphilin-1 transgenic flies. Treatment with STO-609 also suppressed synphilin-1-induced AMPK phosphorylation, hyperphagia and body weight gain. These results demonstrate that the AMPK signaling pathway plays a critical role in synphilin-1-induced hyperphagia and obesity. These findings provide new insights into the mechanisms of synphilin-1-controlled energy homeostasis.

**KEY WORDS:** Synphilin-1, Obesity, AMPK, Energy homeostasis, Hyperphagia

## INTRODUCTION

Obesity has become a worldwide epidemic and a major health problem. However, the etiology of obesity is still not fully understood. Recent studies suggest that synphilin-1 is involved in regulating food intake and body weight (Li et al., 2012; Liu et al., 2012). Synphilin-1 is a 919-amino acid protein and is expressed in various tissues (Engelender et al., 1999; Nagano et al., 2003; Ribeiro et al., 2002), such as in neurons in many regions of the brain, including the hypothalamus, a central nervous system site critical for energy homeostasis (Engelender et al., 1999; Li et al., 2010, 2012; Nagano et al., 2003; Ribeiro et al., 2002; Wakabayashi et al., 2000). The biological functions of synphilin-1 are not clear.

Previous studies have shown that synphilin-1 can interact with multiple proteins (e.g. alpha-synuclein), and has implications in the pathogenesis of Parkinson's disease related to protein aggregation (Alvarez-Castelao and Castaño, 2011; Avraham et al., 2005; Chung et al., 2001; Engelender et al., 1999; Lee et al., 2004; Marx et al., 2007; O'Farrell et al., 2001; Ribeiro et al., 2002; Ryo et al., 2006; Smith et al., 2010, 2005; Szargel et al., 2008; Wakabayashi et al., 2000). We and others have demonstrated that synphilin-1 has neurotrophic and neuroprotective effects (Giaime et al., 2006; Hernández-Vargas et al., 2011; Li et al., 2010; Smith et al., 2010). Our previous studies demonstrated that synphilin-1 fosters a positive energy balance, resulting in hyperphagia and obesity in transgenic mice and flies (Li et al., 2012; Liu et al., 2012). However, it is not clear how synphilin-1 contributes to this energy balance.

Recently, using *in vitro* cell culture models, we found that synphilin-1 interacts with AMP-activated protein kinase (AMPK, a serine/threonine kinase), and regulates cellular energy currency, ATP (Li et al., 2014, 2020). AMPK is an integrator of regulatory signals monitoring cellular and systemic energy status (Hue and Rider, 2007; Kola et al., 2008; Misra, 2008; Ruderman et al., 2013; Winder and Thomson, 2007) in response to nutrition changes. AMPK is also a master regulator of food intake by integrating nutrient and hormonal signals (Ruderman et al., 2013; Xue and Kahn, 2006). A decrease in hypothalamic AMPK activity is associated with decreased feeding, whereas activation of AMPK leads to increased food intake. Insulin and leptin suppress hypothalamic AMPK activity (Minokoshi et al., 2004). Orexigenic peptides, such as the gut-derived hormone ghrelin and the neuropeptide agouti-related peptide (Minokoshi et al., 2004), stimulate hypothalamic AMPK activity to increase food intake (Andersson et al., 2004; Hardie, 2007, 2008; Kim et al., 2004; Moran and Gao, 2006; Sinnett and Brenman, 2016). However, it is unclear whether synphilin-1 interacting with AMPK plays a role in synphilin-1-induced food intake and body weight gain.

In this study, we used our synphilin-1 transgenic *Drosophila* model to investigate whether synphilin-1 alters AMPK signaling, thereby resulting in hyperphagia and obesity. By combining extensive genetic, behavioral and pharmacological approaches, we found that expression of human synphilin-1 in flies activates the AMPK signaling event, and leads to increased food intake, fat storage and body weight. Our results demonstrate that synphilin-1-linked AMPK signaling regulates feeding behavior and metabolism *in vivo*.

## RESULTS

### Synphilin-1 increased AMPK phosphorylation in *Drosophila*

Our previous studies found that that synphilin-1 interacts with, and activates, AMPK in cell model systems (Li et al., 2020). Expression of synphilin-1 in *Drosophila* increases food intake and body weight (Liu et al., 2012). Given that there is not a homologous gene of

<sup>1</sup>Department of Pharmaceutical Sciences, University of Maryland School of Pharmacy, Baltimore, MD 21201, USA. <sup>2</sup>Department of Psychiatry, Johns Hopkins University School of Medicine, Baltimore, MD 21287, USA.

\*Present address: School of Life Science and Technology, ShanghaiTech University, Shanghai, China 201210.

‡Author for correspondence (wsmith60@jhmi.edu)

 R.M., 0000-0002-9457-849X; W.W.S., 0000-0002-6482-5154

human synphilin-1 in *Drosophila*, the human synphilin-1 transgenic *Drosophila* model provides a unique system to study the functions of human synphilin-1 protein in regulating energy balance. To further assess whether synphilin-1 alters AMPK *in vivo*, head homogenates of Elav-GAL4;UAS-SP1 and non-transgenic flies were subjected to western blot analysis using anti-phosphorylated AMPK antibodies. The Elav-Gal4 driver can lead to expression of synphilin-1 in pan neurons in flies. We found that there was significantly increased AMPK phosphorylation at Thr172, up to 3.4-fold, in flies expressing human synphilin-1 compared with non-transgenic control flies (Fig. 1). These results further support the notion that synphilin-1 upregulates AMPK activation *in vivo*.

### Knockdown of AMPK suppressed synphilin-1-induced hyperphagia and obesity-like phenotypes

AMPK is highly conserved from *Drosophila* to mammal. In *Drosophila melanogaster*, mono-allelic expression of AMPK- $\alpha$ , - $\beta$  and - $\gamma$  produces a single heterotrimeric energy sensor that regulates energetic homeostasis (Sinnott and Brenman, 2016). Unlike mammalian AMPK, which has multiple subunit isoforms ( $\alpha_{1-2}$ ,  $\beta_{1-2}$  and  $\gamma_{1-3}$ ) resulting in 12 unique heterotrimers, *Drosophila* has a single gene for each AMPK subunit and only form one AMPK heterotrimer (Sinnott and Brenman, 2016). To further assess whether AMPK signaling alters synphilin-1-linked

obesity-like phenotypes, three UAS-AMPK $\alpha$  siRNA lines (25931, 32371 and 35137) targeting the *Drosophila* AMPK $\alpha$  gene (also known as SNF1A) were used to knockdown AMPK $\alpha$  in Elav-GAL4;UAS-SP1 transgenic flies. Total AMPK (Fig. 1A,B) and phosphorylated AMPK (Fig. 1A,C) were significantly decreased in both non-transgenic and synphilin-1 transgenic flies when they co-expressed AMPK $\alpha$  siRNA. The UAS-AMPK $\alpha$  siRNA (32371) line displayed the highest knockdown efficiency on AMPK levels in synphilin-1 transgenic flies.

To assess whether AMPK activation alters synphilin-1-induced feeding behavior, a capillary feeding (CAFE) assay was used to measure food intake. Knockdown of AMPK significantly reduced the daily food intake by ~40% in non-transgenic flies (Fig. 2). Importantly, knockdown of AMPK by the 25931 or 32371 AMPK $\alpha$ -RNAi siRNA lines almost reversed the synphilin-1-induced hyperphagia in transgenic flies (Fig. 2). Consistent with the levels of AMPK knockdown, the UAS-AMPK siRNA (32371) line had the greatest effect on reducing food intake. The knockdown of AMPK also reduced the body weight gain of non-transgenic and synphilin-1 transgenic flies (Fig. 3A). Triglyceride (TAG) is one of the major intracellular forms of stored energy in flies, representing fat storage. Knockdown of AMPK also reduced the TAG levels in non-transgenic flies and attenuated the synphilin-1-induced fat storage in transgenic flies (Fig. 3B). These results suggest that

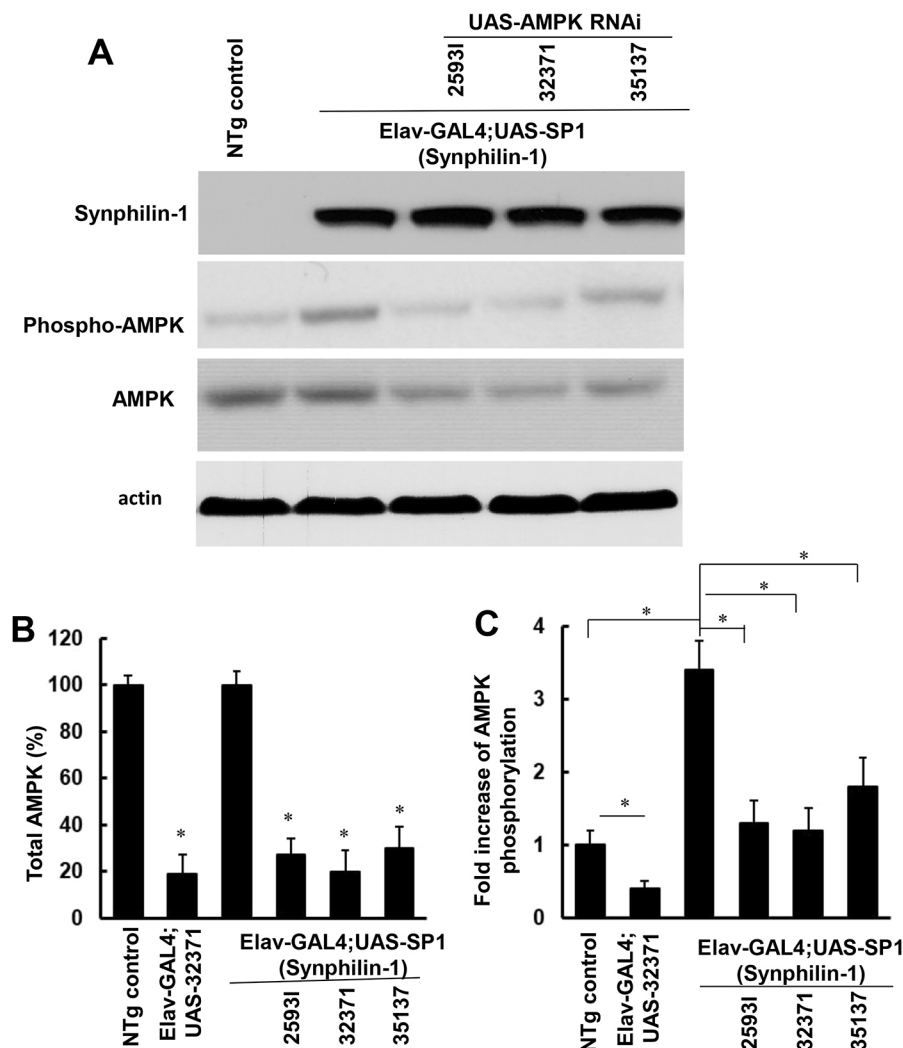

**Fig. 1. Synphilin-1 increases AMPK phosphorylation in flies.** (A-C) The homogenates

from adult non-transgenic and Elav-GAL4;UAS-SP1 transgenic 10-day-old flies with or without UAS-AMPK RNAi (25931, 32371 and 35137) were subjected to western blot analysis (A, representative blots) using anti-phospho-AMPK, anti-AMPK, anti-synphilin-1 and anti-actin antibodies. In each experiment, three fly heads were pooled together for one sample. There were six samples in each experimental group for western blot analysis. The quantification of total (B, \* $P$ <0.05 versus NTg group) and phosphorylated (C, \* $P$ <0.05 represents significance between groups as indicated) AMPK levels was normalized to actin. Data are mean $\pm$ s.e.m. and were analyzed by ANOVA followed by Tukey's post-hoc test.

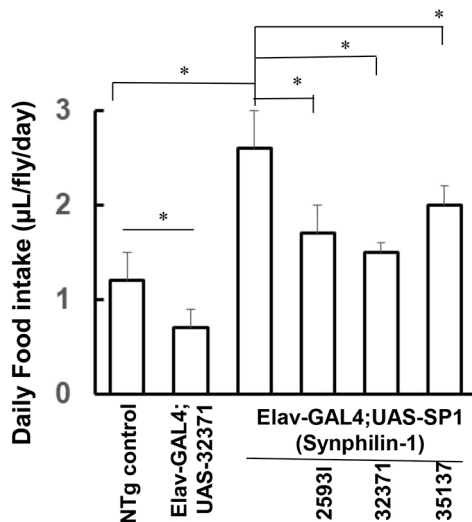

**Fig. 2. Knockdown of AMPK suppressed synphilin-1-induced hyperphagia in flies.** Bar graph showing food intake of various flies as indicated (observed at 1 to 5 days post-eclosion). Knockdown of AMPK significantly reduced the daily food intake by ~40% in non-transgenic flies. Knockdown of AMPK by the 25931 or 32371 AMPK $\alpha$ -RNAi siRNA lines almost reversed the synphilin-1-induced hyperphagia in transgenic flies. There were 60 flies in each group. Data are mean $\pm$ s.e.m. \* $P$ <0.05 (ANOVA followed by Tukey's post-hoc test; significance between groups as indicated).

AMPK signaling mediates synphilin-1-induced hyperphagia and fat deposition.

#### Expression of DN-AMPK reduced food intake and body weight gain in synphilin-1 flies

To further study the roles of AMPK in synphilin-1-induced obesity-like phenotypes, *Elav-Gal4;UAS-SPI* flies were crossed with *UAS-AMPK $\alpha$ <sup>K57A</sup>* [a dominant-negative (DN) form of AMPK] or *UAS-AMPK $\alpha$ <sup>T184D</sup>* (a constitutively active form of AMPK). Expression of AMPK $\alpha$ <sup>K57A</sup> reduced daily food intake in normal flies by ~35% (Fig. 4), and suppressed synphilin-1-induced hyperphagia (Fig. 4A) and body weight gain (Fig. 4B). In contrast, expression of AMPK $\alpha$ <sup>T184D</sup> increased food intake and body weight in normal flies (Fig. 4), but it did not alter the food intake and body weight in synphilin-1 transgenic flies (Fig. 4). This may be a result of synphilin-1-induced hyperphagia that could not further increase food intake by AMPK $\alpha$ <sup>T184D</sup> expression.

#### Inhibition of AMPK phosphorylation reduced food intake in synphilin-1 flies

Previous studies report that STO-609 can reduce AMPK phosphorylation, as it is a relative specific inhibitor of Ca<sup>2+</sup>/calmodulin-dependent protein kinase kinase isoform 2 (CaMKK2), an upstream kinase of AMPK (Tokumitsu et al., 2003). STO-609 (1  $\mu$ M) was added to the food of the *Elav-Gal4;SPI* flies beginning on the first day of eclosion for 10 days. STO-609 significantly attenuated synphilin-1-induced AMPK phosphorylation (Fig. 5A,B). Moreover, STO-609 significantly suppressed synphilin-1-induced food intake (Fig. 5C) and body weight gain (Fig. 5D) in transgenic flies compared with untreated synphilin-1 flies. However, treatment with STO-609 at 1  $\mu$ M in fly food only slightly (with no statistical significance) altered food intake and body weight in normal flies. This could be a result of STO-609 more effectively suppressing food intake and body weight gain in

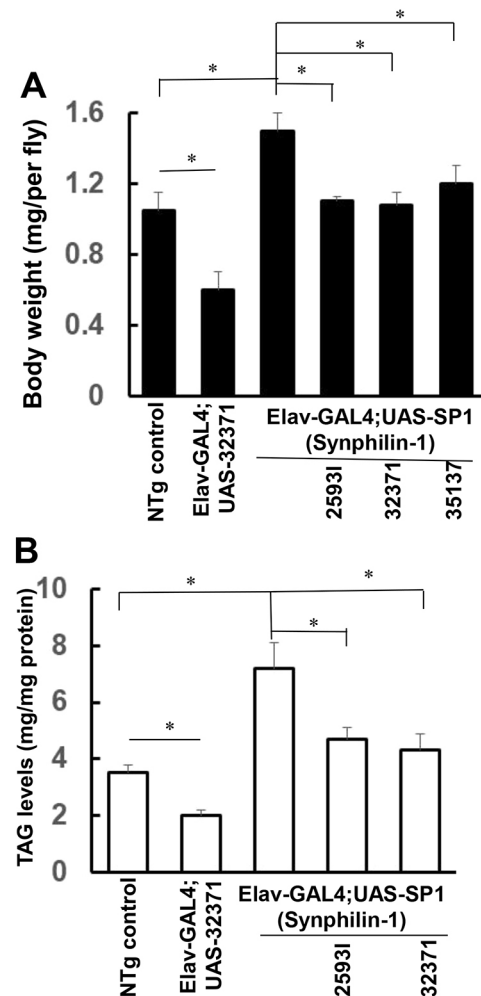

**Fig. 3. Knockdown of AMPK suppressed synphilin-1-induced body weight gain in flies.** (A) Bar graph showing the body weight of various flies as indicated (measured at 10 days of age). There were 60 flies in each group. (B) Bar graph showing that knockdown of AMPK reduced the TAG levels in both non-transgenic and synphilin-1 transgenic flies. TAG levels of various flies as indicated. Data are mean $\pm$ s.e.m. \* $P$ <0.05 (ANOVA followed by Tukey's post-hoc test; significance between groups as indicated).

synphilin-1 transgenic flies with elevated AMPK phosphorylation than in normal flies with basal levels of AMPK phosphorylation. Our results suggest that synphilin-1 regulates the AMPK signaling pathway, thereby inducing hyperphagia and body weight gain.

#### DISCUSSION

The main finding of this study was that synphilin-1 regulated AMPK signalling, thereby leading to hyperphagia and obesity-like phenotypes in *Drosophila*. Our data revealed that the expression of synphilin-1 in neurons in flies increased AMPK phosphorylation (activation). Knockdown of AMPK or expression of DN-AMPK reduced food intake and body weight gain in normal flies and further attenuated synphilin-1-induced hyperphagia, fat deposition and body weight gain. Treatment with STO-609 also reduced synphilin-1-induced hyperphagia and obesity-like phenotypes in flies. These results indicate that the synphilin-1-linked AMPK pathway plays a critical role in controlling food intake and body weight.

AMPK is an energy sensor that monitors cellular energy status in response to nutritional changes (Hue and Rider, 2007; Kola et al., 2008; Misra, 2008; Ruderman et al., 2013; Winder and Thomson,

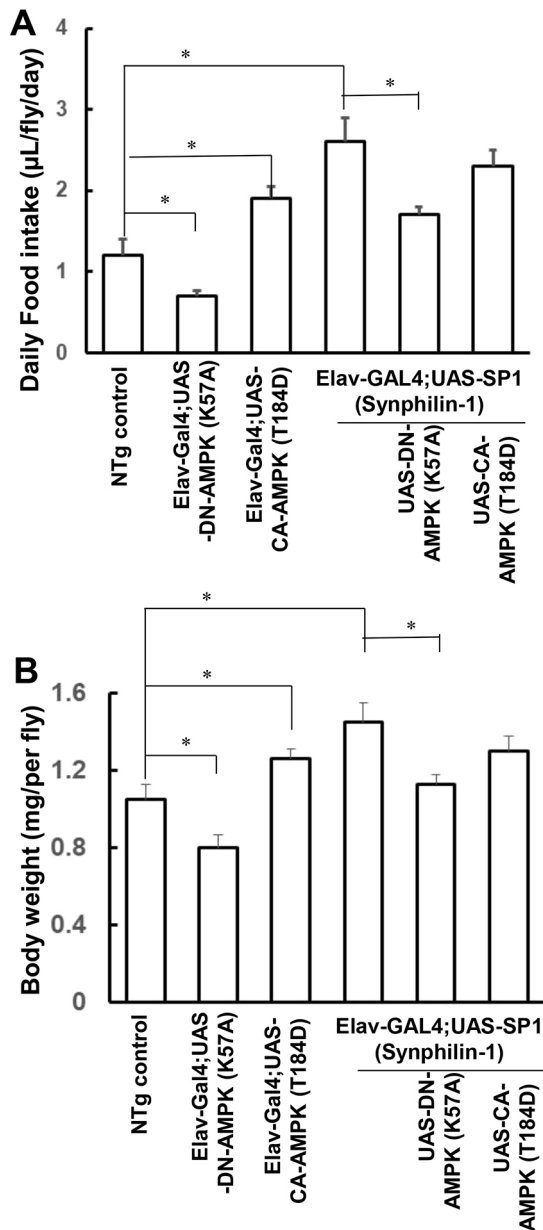

**Fig. 4. Expression of DN-AMPK K57A suppressed synphilin-1-induced food intake and body weight gain in flies.** *Elav-Gal4;SP1* flies were crossed with *UAS-AMPK-DN*. (A) Food intake of various flies as indicated was observed at 1 to 5 days post-eclosion. (B) The body weight of various flies as indicated was measured at 10 days of age. There were 60 flies in each group. Data are mean±s.e.m. \* $P < 0.05$  (ANOVA followed by Tukey's post-hoc test; significance between groups as indicated).

2007) via energy-producing catabolic pathways and energy-consuming anabolic pathways (Ruderman et al., 2013). Disruption of the AMPK pathway leads to metabolic dysregulation and causes various metabolic disorders. AMPK modulates a wide range of metabolic pathways and has become a therapeutic target for the treatment of obesity, type II diabetes mellitus and other related disorders. Our previous cell culture studies report that synphilin-1 binds with and activates AMPK (Li et al., 2020). In this study, we found that knockdown of AMPK or expression of DN-AMPK reduced food intake and body weight gain in normal flies. Moreover, we further validated that overexpression of synphilin-1 increases AMPK phosphorylation (activation) in flies *in vivo*. Knockdown of

AMPK with siRNA, or expression of DN-AMPK, reduced both total and phosphorylated AMPK levels in human synphilin-1 transgenic flies, and further reduced synphilin-1-induced hyperphagia and body weight gain. Furthermore, overexpression of AMPK-DN-K57A, or treatment with STO-609, also suppressed synphilin-1-induced hyperphagia and body weight gain. Our studies are consistent with previous studies in mice, in which knockdown of hypothalamic AMPK reduces food intake and prevents diet-induced body weight gain (Oh et al., 2016). In line with this notion, an increase of hypothalamic AMPK activity by orexigenic peptides (e.g. ghrelin) leads to increased food intake (Andersson et al., 2004; Minokoshi et al., 2004; Moran and Gao, 2006). Fasting increases AMPK activity in the hypothalamus resulting in compensatory increases in food intake, whereas refeeding suppresses it (Minokoshi et al., 2004; Xue and Kahn, 2006). Together, these findings provide the first *in vivo* evidence that AMPK signaling mediates synphilin-1-induced positive energy balance.

Previous studies report that AMPK can be directly phosphorylated on Thr172 and activated by CaM-KK2 in response to metabolic hormones (Carling et al., 2011; Hardie, 2011; Hardie et al., 2012; Zhang et al., 2009). Our results also demonstrated that STO-609, a relative specific CaM-KK2 inhibitor, attenuated synphilin-1-induced AMPK phosphorylation, food consumption and body weight gain in transgenic flies. These findings suggest that CaM-KK2 may be an upstream kinase that phosphorylates AMPK, together playing a critical role in synphilin-1 action in regulating the energy balance. Whether synphilin-1 directly alters CaM-KK2 requires further investigation. Nevertheless, our findings demonstrated that a synphilin-1 regulated AMPK signaling event mediated positive energy balance, thereby resulting in the hyperphagia and obese phenotypes in flies.

Given that AMPK is a central regulator of energy metabolism (Carling et al., 2011; Hardie, 2011; Hardie et al., 2012; Zhang et al., 2009), targeting of the synphilin-1-linked AMPK pathway could be a potential therapeutic strategy for obesity intervention. *In vitro* studies in cell models have shown that synphilin-1 interacts with, and activates, AMPK, resulting in elevated cellular ATP levels (Li et al., 2014, 2020). In *Drosophila* models, synphilin-1 activates AMPK signaling pathways and induces hyperphagia and obesity (Liu et al., 2012). The inhibition of the AMPK signaling pathway by STO-609 reduced synphilin-1-induced food consumption, providing the proof of principle for further drug development. Our synphilin-1 obesity fly model provides a useful model for future pathogenesis and therapeutic studies of obesity and other related disorders.

In summary, this study provides the first *in vivo* evidence that the synphilin-1-regulated AMPK signaling pathway mediates positive energy homeostasis, resulting in hyperphagia and obesity. These findings not only provide a novel insight into synphilin-1 actions in energy homeostasis but also provide a potential therapeutic target for obesity intervention.

## MATERIALS AND METHODS

### Materials

Commercial antibodies were used in this study, including anti-phosphorylated-AMPK $\alpha$  (Thr172) antibody (1:1000; catalog number 2535S, Cell Signaling Technology, USA), anti-total-AMPK $\alpha$  1/2 antibody (1:1000; catalog number B1297, Creative Diagnostics, USA) and anti- $\beta$ -actin antibody (1:2000; catalog number A2228, Sigma-Aldrich, USA). The homemade anti-human synphilin-1 polyclonal antibody was generated as described previously (Engelender et al., 1999). STO-609 (a CaM-KK2 inhibitor) (Tokumitsu et al., 2003) was obtained from Sigma-Aldrich.

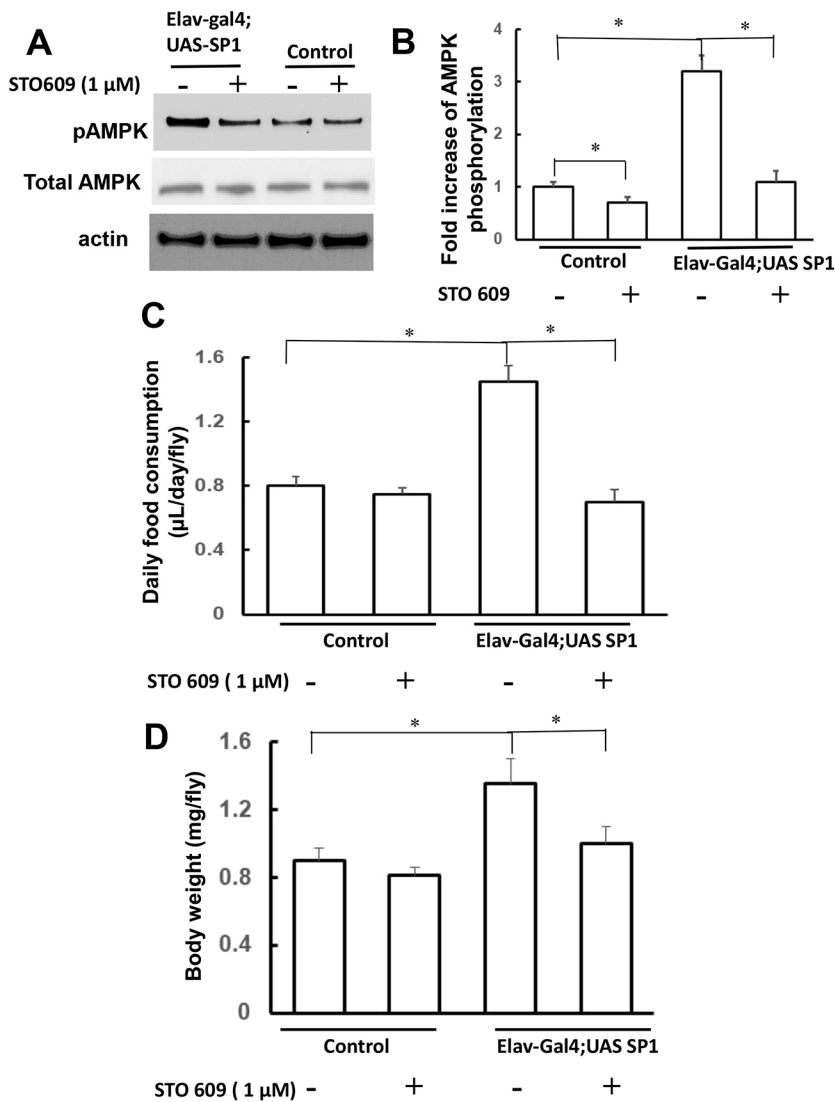

**Fig. 5. STO-609 attenuated synphilin-1-induced food consumption in flies.** STO-609 (1  $\mu$ M) was added to the fly food, beginning on day 1 of eclosion and continuing for 10 days. (A,B) The fly homogenates were subjected to western blot analysis (A, representative blots) using anti-phospho-AMPK, anti-AMPK and anti-actin antibodies. The quantification of phosphorylated AMPK levels (B) was normalized to actin. (B) Bar graph showing that STO-609 significantly attenuated synphilin-1-induced AMPK phosphorylation. (C,D) Bar graphs showing that STO-609 significantly suppressed synphilin-1-induced food intake (C) and body weight gain (D) in transgenic flies (Elav-Gal4; UAS-SP1) compared with untreated synphilin-1 flies (control). There were 60 flies in each group. Data are mean  $\pm$  s.e.m. \* $P$ <0.05 (paired  $t$ -test; significance between groups as indicated).

### Fly stocks and maintenance

The UAS-human synphilin-1 (UAS-SP1) fly line was generated and maintained in our laboratory as described previously (Liu et al., 2012). The Elav-Gal4 driver flies were obtained from Dr Craig Montel (Johns Hopkins University, Baltimore, MD, USA). The three UAS-AMPK RNAi lines targeting the *AMPK $\alpha$*  gene, including *AMPK $\alpha$ <sup>TRiP.JF01951</sup>* (25931), *AMPK $\alpha$ <sup>TRiP.HMS00362</sup>* (32371), *AMPK $\alpha$ <sup>TRiP.GL00004</sup>* (35137), UAS *AMPK $\alpha$ <sup>K57A</sup>* (32112) and UAS *AMPK $\alpha$ <sup>T184D</sup>* (32110), were obtained from the Bloomington *Drosophila* Stock Center. All flies were cultured in 25 ml fly culture vials with standard commmeal medium, except during the feeding experiments. All flies were kept in a Microprocessor Controlled Low Temperature Illuminated Incubator (Thermo Fisher Scientific) at 25°C, with humidity at 55%, and with a 12 h light-12 h dark cycle.

### Western blot analysis

Fly heads were harvested in RIPA buffer (Cell Signaling Technology) with protease inhibitors (10  $\mu$ g/ml aprotinin, 5 mM phenylmethylsulfonyl fluoride, 10  $\mu$ g/ml pepstatin and 10  $\mu$ g/ml leupeptin) as described previously (Li et al., 2010). Three fly heads pooled together for one sample. There were six samples in each experimental group for western blot analysis. Proteins from each sample were separated on 4–12% NuPAGE Bis-Tris gels and transferred onto PVDF membranes (Invitrogen). The PVDF membranes were blocked with 5% non-fat milk and incubated with various primary and secondary detection antibodies. Enhanced chemiluminescence reagents (PerkinElmer) were used to detect the proteins in PVDF

membranes. The quantification of total or phosphorylated AMPK levels was normalized to actin levels. The fold increase of protein levels was relative to non-transgenic control flies (without any genetic alteration or treatment).

### Body weight and food intake measurement

Body weight of adult flies was measured using a Sartorius Microbalance ME5 (Thermo Fisher Scientific) with the threshold reading up to 0.0001 mg as described previously. Ten flies were measured together and each individual weight value was the average of ten flies. Fly food intake was measured using CAFE assays at the age of 1 to 10 days post-eclosion, as described previously (Ja et al., 2007; Liu et al., 2012). Briefly, the CAFE assay was performed using a fly vial with 1% agar (15 ml) covered with a foam plug. A truncated 200  $\mu$ l pipette tip was inserted through the foam plug and a glass capillary tube was placed inside this tip with 5% sugar solution. Each experiment was performed under a 12-h-light/12-h-dark cycle for 3 days followed by 4 h of starvation. The food intake value was the average of 3 days. A CAFE chamber without flies was employed as a control for evaporative losses. The readings for evaporative loss were subtracted from the fly food intake readings (Ja et al., 2007; Liu et al., 2012).

### TAG measurement

Flies were homogenized in PBS buffer containing 1% Triton X-100, and incubated at 70°C for 10 min. Heat-treated homogenates were added with free glycerol reagent (Sigma-Aldrich) for 5 min at 37°C. Samples were

subjected to a BioTek Synergy HT microplate spectrophotometer at 540 nm. TAG levels were normalized to protein levels.

### STO-609 treatment

STO-609 was added to the fly food from day 1 of eclosion and continued for 10 days. Fresh food with drugs was provided every 3 to 4 days. Food intake and body weight were recorded during the treatment.

### Data analysis

Quantitative data were represented as mean±s.e.m. All data from each experiment were subjected to a normal distribution test using Kolmogorov–Smirnov and Shapiro–Wilk methods. Once we confirmed normal distribution of the data, comparisons of protein levels, food intake, body weight and protein levels were analyzed using parametric tests including *t*-test or one-way or two-way ANOVA followed by Tukey's post-hoc test using SigmaStat 3.1 statistical software (Aspire Software International). Comparisons of the effects of STO-609 were analyzed using paired *t*-tests. *P*<0.05 was considered significant.

### Acknowledgements

We thank Dr Craig Montel for providing the Elav-Gal4 driver flies.

### Competing interests

The human synphilin-1 transgenic *Drosophila* line is a tangible property of the University of Maryland.

### Author contributions

Conceptualization: J.L., T.H.M., W.W.S.; Methodology: J.L., X.W., R.M., T.L., G.G.; Validation: J.L., X.W., R.M., T.L., B.N., W.W.S.; Formal analysis: J.L.; Investigation: J.L., X.W., R.M., T.L., G.G., B.N., W.W.S.; Data curation: W.W.S.; Writing - original draft: J.L., W.W.S.; Writing - review & editing: T.H.M., W.W.S.; Supervision: W.W.S.; Project administration: W.W.S.; Funding acquisition: W.W.S.

### Funding

This work was supported by National Institutes of Health (DK083410 to W.W.S.). Deposited in PMC for release after 12 months.

### References

- Alvarez-Castelao, B. and Castaño, J. G. (2011). Synphilin-1 inhibits alpha-synuclein degradation by the proteasome. *Cell. Mol. Life Sci.* **68**, 2643–2654. doi:10.1007/s00018-010-0592-3
- Andersson, U., Filipsson, K., Abbott, C. R., Woods, A., Smith, K., Bloom, S. R., Carling, D. and Small, C. J. (2004). AMP-activated protein kinase plays a role in the control of food intake. *J. Biol. Chem.* **279**, 12005–12008. doi:10.1074/jbc.C300557200
- Avraham, E., Szargel, R., Eyal, A., Rott, R. and Engelender, S. (2005). Glycogen synthase kinase 3 $\beta$  modulates synphilin-1 ubiquitylation and cellular inclusion formation by SIAH: implications for proteasomal function and Lewy body formation. *J. Biol. Chem.* **280**, 42877–42886. doi:10.1074/jbc.M505608200
- Carling, D., Mayer, F. V., Sanders, M. J. and Gamblin, S. J. (2011). AMP-activated protein kinase: nature's energy sensor. *Nat. Chem. Biol.* **7**, 512–518. doi:10.1038/nchembio.610
- Chung, K. K. K., Zhang, Y., Lim, K. L., Tanaka, Y., Huang, H., Gao, J., Ross, C. A., Dawson, V. L. and Dawson, T. M. (2001). Parkin ubiquitinates the  $\alpha$ -synuclein-interacting protein, synphilin-1: implications for Lewy-body formation in Parkinson disease. *Nat. Med.* **7**, 1144–1150. doi:10.1038/nm1001-1144
- Engelender, S., Kaminsky, Z., Guo, X., Sharp, A. H., Amaravi, R. K., Kleiderlein, J. J., Margolis, R. L., Troncoso, J. C., Lanahan, A. A., Worley, P. F. et al. (1999). Synphilin-1 associates with  $\alpha$ -synuclein and promotes the formation of cytosolic inclusions. *Nat. Genet.* **22**, 110–114. doi:10.1038/8820
- Gaiame, E., Sunyach, C., Herrant, M., Grosso, S., Auberger, P., McLean, P. J., Checler, F. and da Costa, C. A. (2006). Caspase-3-derived C-terminal product of synphilin-1 displays antiapoptotic function via modulation of the p53-dependent cell death pathway. *J. Biol. Chem.* **281**, 11515–11522. doi:10.1074/jbc.M508619200
- Hardie, D. G. (2007). AMP-activated/SNF1 protein kinases: conserved guardians of cellular energy. *Nat. Rev. Mol. Cell Biol.* **8**, 774–785. doi:10.1038/nrm2249
- Hardie, D. G. (2008). AMPK and Raptor: matching cell growth to energy supply. *Mol. Cell* **30**, 263–265. doi:10.1016/j.molcel.2008.04.012
- Hardie, D. G. (2011). AMP-activated protein kinase: an energy sensor that regulates all aspects of cell function. *Genes Dev.* **25**, 1895–1908. doi:10.1101/gad.17420111
- Hardie, D. G., Ross, F. A. and Hawley, S. A. (2012). AMP-activated protein kinase: a target for drugs both ancient and modern. *Chem. Biol.* **19**, 1222–1236. doi:10.1016/j.chembiol.2012.08.019
- Hernández-Vargas, R., Fonseca-Ornelas, L., López-González, I., Riesgo-Escovar, J., Zurita, M. and Reynaud, E. (2011). Synphilin suppresses alpha-synuclein neurotoxicity in a Parkinson's disease Drosophila model. *Genesis* **49**, 392–402. doi:10.1002/dvg.20740
- Hue, L. and Rider, M. H. (2007). The AMP-activated protein kinase: more than an energy sensor. *Essays Biochem.* **43**, 121–138. doi:10.1042/bse0430121
- Ja, W. W., Carvalho, G. B., Mak, E. M., de la Rosa, N. N., Fang, A. Y., Liong, J. C., Brummel, T. and Benzer, S. (2007). Prandiology of *Drosophila* and the CAFE assay. *Proc. Natl. Acad. Sci. USA* **104**, 8253–8256. doi:10.1073/pnas.0702726104
- Kim, E.-K., Miller, I., Aja, S., Landree, L. E., Pinn, M., McFadden, J., Kuhajda, F. P., Moran, T. H. and Ronnett, G. V. (2004). C75, a fatty acid synthase inhibitor, reduces food intake via hypothalamic AMP-activated protein kinase. *J. Biol. Chem.* **279**, 19970–19976. doi:10.1074/jbc.M402165200
- Kola, B., Grossman, A. B. and Korbonits, M. (2008). The role of AMP-activated protein kinase in obesity. *Front. Horm. Res.* **36**, 198–211. doi:10.1159/000115366
- Lee, G., Tanaka, M., Park, K., Lee, S. S., Kim, Y. M., Junn, E., Lee, S.-H. and Mouradian, M. M. (2004). Casein kinase II-mediated phosphorylation regulates  $\alpha$ -synuclein/synphilin-1 interaction and inclusion body formation. *J. Biol. Chem.* **279**, 6834–6839. doi:10.1074/jbc.M312760200
- Li, X., Liu, Z., Tamashiro, K., Shi, B., Rudnicki, D. D., Ross, C. A., Moran, T. H. and Smith, W. W. (2010). Synphilin-1 exhibits trophic and protective effects against Rotenone toxicity. *Neuroscience* **165**, 455–462. doi:10.1016/j.neuroscience.2009.10.042
- Li, X., Tamashiro, K. L. K., Liu, Z., Bello, N. T., Wang, X., Aja, S., Bi, S., Ladenheim, E. E., Ross, C. A., Moran, T. H. et al. (2012). A novel obesity model: synphilin-1-induced hyperphagia and obesity in mice. *Int. J. Obes.* **36**, 1215–1221. doi:10.1038/ijo.2011.235
- Li, T., Liu, J. and Smith, W. W. (2014). Synphilin-1 binds ATP and regulates intracellular energy status. *PLoS ONE* **9**, e115233. doi:10.1371/journal.pone.0115233
- Li, T., Liu, J., Guo, G., Ning, B., Li, X., Zhu, G., Yang, D., Moran, T. H. and Smith, W. W. (2020). Synphilin-1 interacts with AMPK, and increases AMPK phosphorylation. *Cells* **21**, 4352. doi:10.3390/ijms21124352
- Liu, J., Li, T., Yang, D., Ma, R., Moran, T. H. and Smith, W. W. (2012). Synphilin-1 alters metabolic homeostasis in a novel *Drosophila* obesity model. *Int. J. Obes.* **36**, 1529–1536. doi:10.1038/ijo.2012.111
- Marx, F. P., Soehn, A. S., Berg, D., Melle, C., Schiesling, C., Lang, M., Kautzmann, S., Strauss, K. M., Franck, T., Engelender, S. et al. (2007). The proteasomal subunit S6 ATPase is a novel synphilin-1 interacting protein—implications for Parkinson's disease. *FASEB J.* **21**, 1759–1767. doi:10.1096/fj.06-6734com
- Minokoshi, Y., Alquier, T., Furukawa, N., Kim, Y.-B., Lee, A., Xue, B., Mu, J., Foufelle, F., Ferré, P., Birnbaum, M. J. et al. (2004). AMP-kinase regulates food intake by responding to hormonal and nutrient signals in the hypothalamus. *Nature* **428**, 569–574. doi:10.1038/nature02440
- Misra, P. (2008). AMP activated protein kinase: a next generation target for total metabolic control. *Expert Opin Ther. Targets* **12**, 91–100. doi:10.1517/14728222.12.1.91
- Moran, T. H. and Gao, S. (2006). Looking for food in all the right places? *Cell Metab.* **3**, 233–234. doi:10.1016/j.cmet.2006.03.004
- Nagano, Y., Yamashita, H., Takahashi, T., Kishida, S., Nakamura, T., Iseki, E., Hattori, N., Mizuno, Y., Kikuchi, A. and Matsumoto, M. (2003). Siah-1 facilitates ubiquitination and degradation of synphilin-1. *J. Biol. Chem.* **278**, 51504–51514. doi:10.1074/jbc.M306347200
- O'Farrell, C., Murphy, D. D., Petrucelli, L., Singleton, A. B., Hussey, J., Farrer, M., Hardy, J., Dickson, D. W. and Cookson, M. R. (2001). Transfected synphilin-1 forms cytoplasmic inclusions in HEK293 cells. *Brain Res. Mol. Brain Res.* **97**, 94–102. doi:10.1016/S0169-328X(01)00292-3
- Oh, T. S., Cho, H., Cho, J. H., Yu, S.-W. and Kim, E.-K. (2016). Hypothalamic AMPK-induced autophagy increases food intake by regulating NPY and POMC expression. *Autophagy* **12**, 2009–2025. doi:10.1080/15548627.2016.1215382
- Ribeiro, C. S., Carneiro, K., Ross, C. A., Menezes, J. R. L. and Engelender, S. (2002). Synphilin-1 is developmentally localized to synaptic terminals, and its association with synaptic vesicles is modulated by  $\alpha$ -synuclein. *J. Biol. Chem.* **277**, 23927–23933. doi:10.1074/jbc.M201115200
- Ruderman, N. B., Carling, D., Prentki, M. and Cacicado, J. M. (2013). AMPK, insulin resistance, and the metabolic syndrome. *J. Clin. Invest.* **123**, 2764–2772. doi:10.1172/JCI67227
- Ryo, A., Togo, T., Nakai, T., Hirai, A., Nishi, M., Yamaguchi, A., Suzuki, K., Hirayasu, Y., Kobayashi, H., Perrem, K. et al. (2006). Prolyl-isomerase Pin1 accumulates in lewy bodies of parkinson disease and facilitates formation of  $\alpha$ -synuclein inclusions. *J. Biol. Chem.* **281**, 4117–4125. doi:10.1074/jbc.M507026200
- Sinnett, S. E. and Brenman, J. E. (2016). The Role of AMPK in *Drosophila* melanogaster. *Exp. Suppl.* **107**, 389–401. doi:10.1007/978-3-319-43589-3\_16
- Smith, W. W., Margolis, R. L., Li, X., Troncoso, J. C., Lee, M. K., Dawson, V. L., Dawson, T. M., Iwatsubo, T. and Ross, C. A. (2005).  $\alpha$ -synuclein

- phosphorylation enhances eosinophilic cytoplasmic inclusion formation in SH-SY5Y cells. *J. Neurosci.* **25**, 5544-5552. doi:10.1523/JNEUROSCI.0482-05.2005
- Smith, W. W., Liu, Z., Liang, Y., Masuda, N., Swing, D. A., Jenkins, N. A., Copeland, N. G., Troncoso, J. C., Pletnikov, M., Dawson, T. M. et al.** (2010). Synphilin-1 attenuates neuronal degeneration in the A53T alpha-synuclein transgenic mouse model. *Hum. Mol. Genet.* **19**, 2087-2098. doi:10.1093/hmg/ddq086
- Szargel, R., Rott, R. and Engelender, S.** (2008). Synphilin-1 isoforms in Parkinson's disease: regulation by phosphorylation and ubiquitylation. *Cell. Mol. Life Sci.* **65**, 80-88. doi:10.1007/s00018-007-7343-0
- Tokumitsu, H., Inuzuka, H., Ishikawa, Y. and Kobayashi, R.** (2003). A single amino acid difference between  $\alpha$  and  $\beta$  Ca<sup>2+</sup>/calmodulin-dependent protein kinase kinase dictates sensitivity to the specific inhibitor, STO-609. *J. Biol. Chem.* **278**, 10908-10913. doi:10.1074/jbc.M213183200
- Wakabayashi, K., Engelender, S., Yoshimoto, M., Tsuji, S., Ross, C. A. and Takahashi, H.** (2000). Synphilin-1 is present in Lewy bodies in Parkinson's disease. *Ann. Neurol.* **47**, 521-523. doi:10.1002/1531-8249(200004)47:4<521::AID-ANA18>3.0.CO;2-B
- Winder, W. W. and Thomson, D. M.** (2007). Cellular energy sensing and signaling by AMP-activated protein kinase. *Cell Biochem. Biophys.* **47**, 332-347. doi:10.1007/s12013-007-0008-7
- Xue, B. and Kahn, B. B.** (2006). AMPK integrates nutrient and hormonal signals to regulate food intake and energy balance through effects in the hypothalamus and peripheral tissues. *J. Physiol.* **574**, 73-83. doi:10.1113/jphysiol.2006.113217
- Zhang, B. B., Zhou, G. and Li, C.** (2009). AMPK: an emerging drug target for diabetes and the metabolic syndrome. *Cell Metab.* **9**, 407-416. doi:10.1016/j.cmet.2009.03.012
